# Supplementary material for: Dietary Oat Bran Reduces Systemic Inflammation in Mice Subjected to Pelvic Irradiation
Source: MDPI journal article supplement (doi:10.3390/nu12082172), 2020-07-22
Supplement: s1 [file s1]

Supplementary Tables

**Table S1.** Composition of the High-oat and No-fiber diets.

| <b>Ingredient (%)</b> | <b>High-oat (15% fiber)</b> | <b>No-fiber (0% fiber)</b> |
|-----------------------|-----------------------------|----------------------------|
| Bioprocessed oat bran | 28.8                        | 0                          |
| Corn starch           | 4.7                         | 33.5                       |
| Basal mixture         | 66.5                        | 66.5                       |
| <b>Total</b>          | <b>100</b>                  | <b>100</b>                 |

**Table S2.** Composition of basal mixture.

| <b>Basal mixture ingredient (g/kg of total diet in dwb*)</b> | <b>High-oat</b> | <b>No-fiber</b> |
|--------------------------------------------------------------|-----------------|-----------------|
| Casein                                                       | 133             | 133             |
| DL-methionine                                                | 2               | 2               |
| Corn starch                                                  | 250             | 250             |
| Maltodextrin                                                 | 87              | 87              |
| Sucrose                                                      | 106             | 106             |
| Olive oil                                                    | 47              | 47              |
| Vitamin mixture                                              | 10              | 10              |
| Choline bitartrate                                           | 2               | 2               |
| TBHQ <sup>#</sup>                                            | 0.01            | 0.01            |
| Mineral mixture                                              | 13              | 13              |
| Calcium phosphate                                            | 11              | 11              |
| Calcium carbonate                                            | 4               | 4               |

\*Dry-weight basis. <sup>#</sup>Tertiary butylhydroquinone

Supplementary Figures

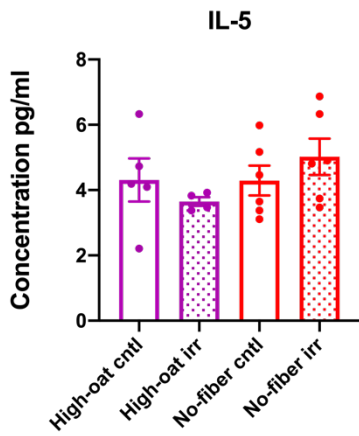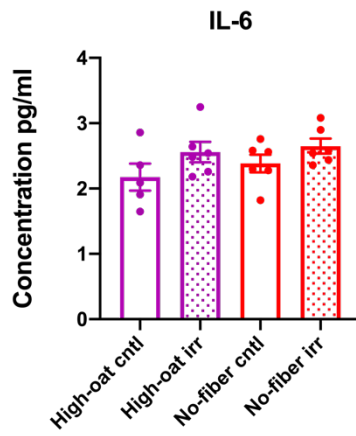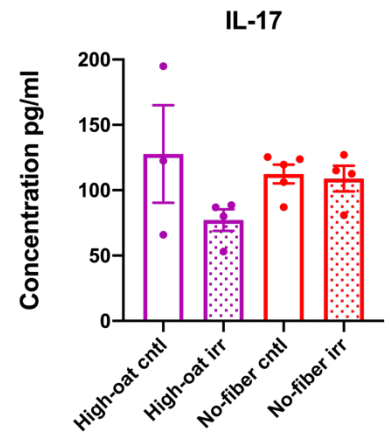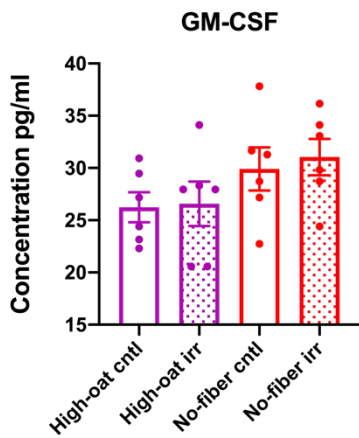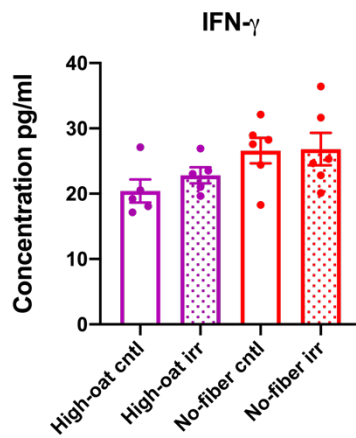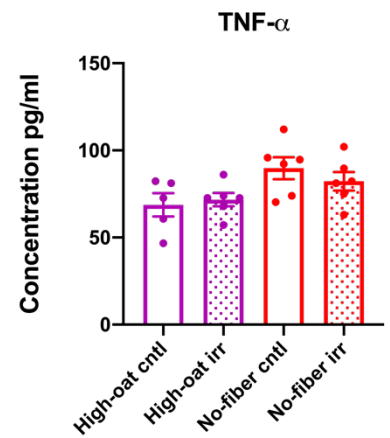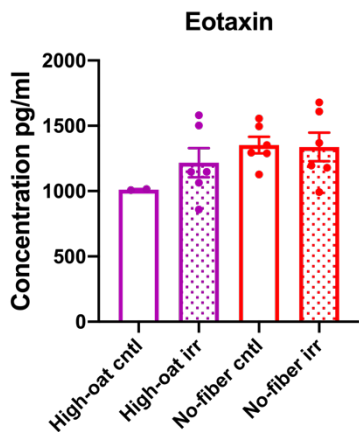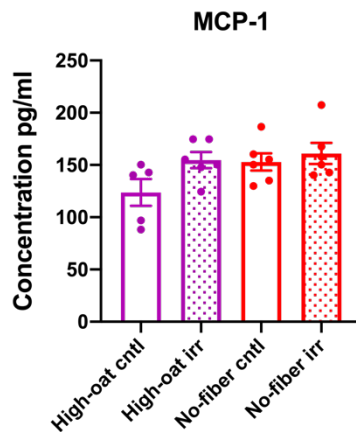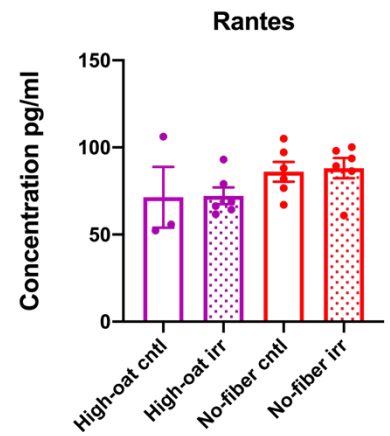

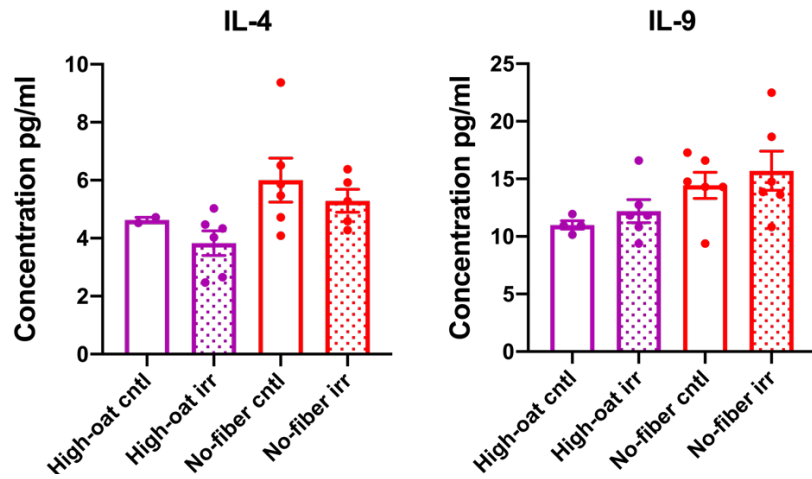

**Figure S1.** Serum cytokine and chemokine levels in mice at 1 week post-irradiation. A two-tailed Mann–Whitney test was used to compare the cytokine and chemokine levels in High-oat irr vs. High-oat cntl, No-fiber irr vs. No-fiber cntl, High-oat irr vs. No-fiber irr, and High-oat cntl vs. No-fiber cntl groups. Data shown are average concentrations and the error bars represent SEM.

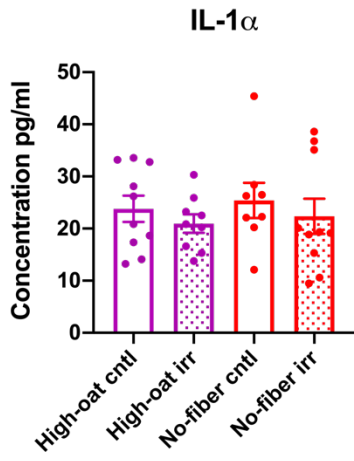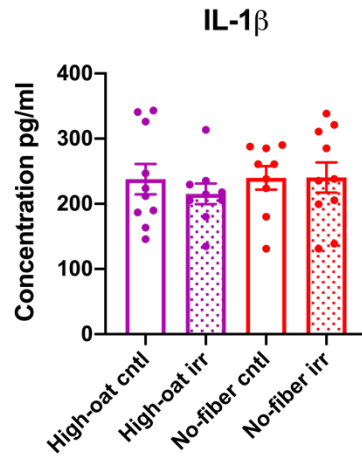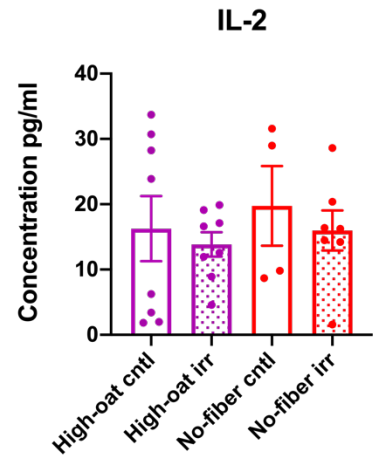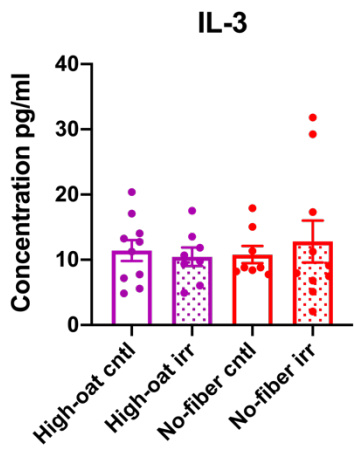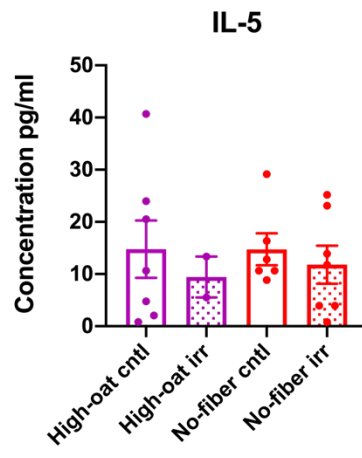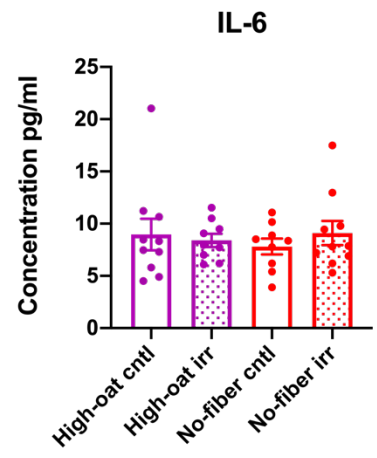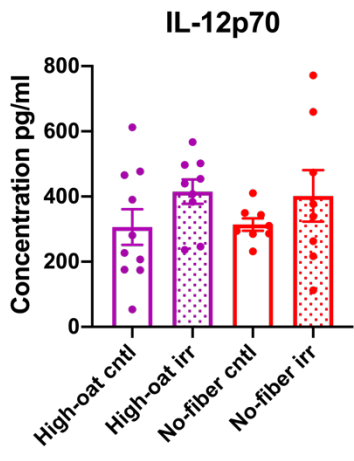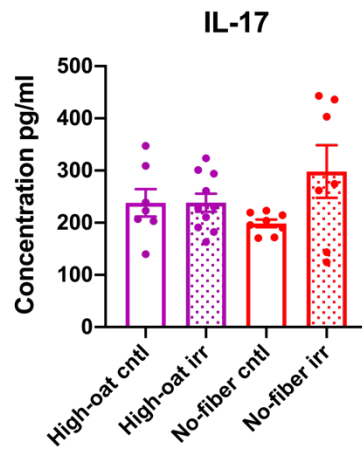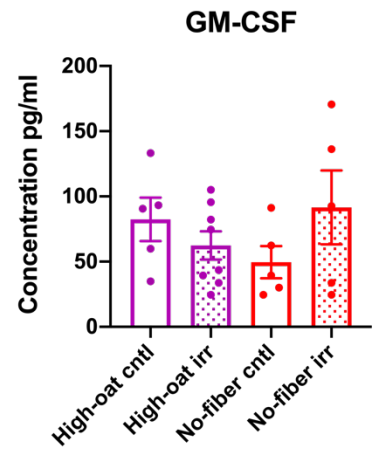

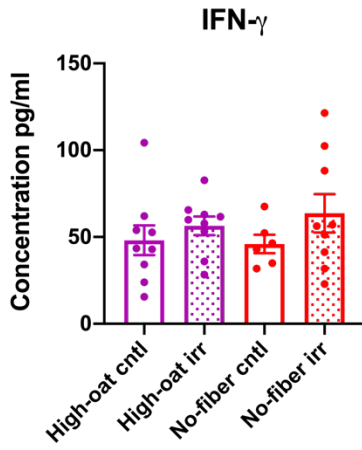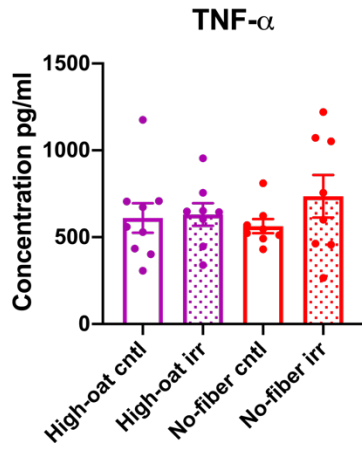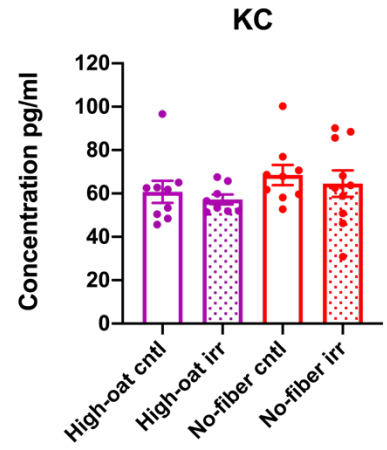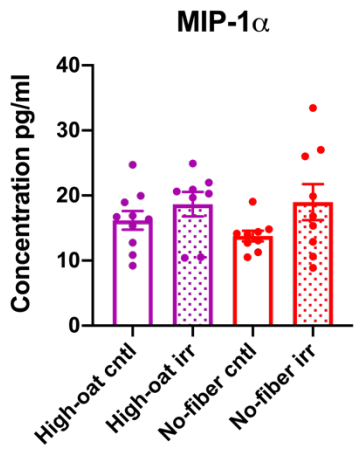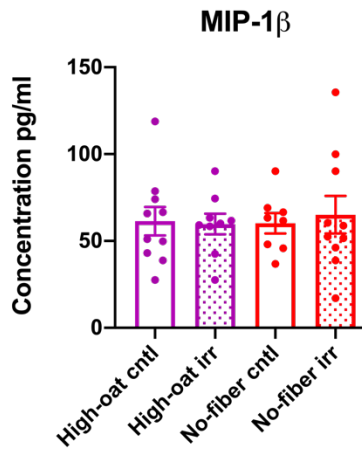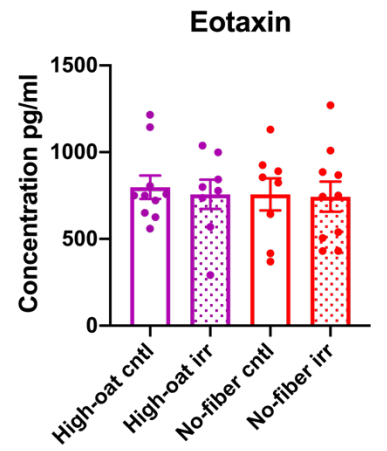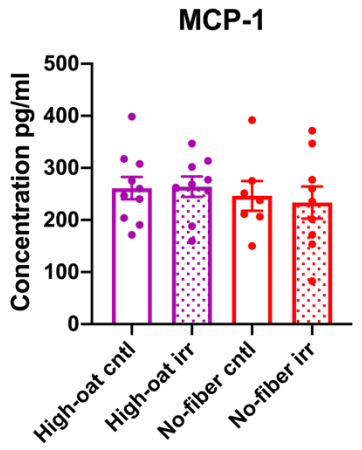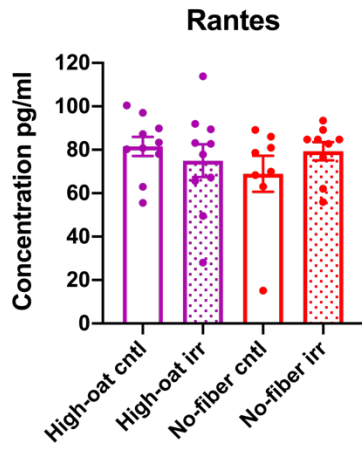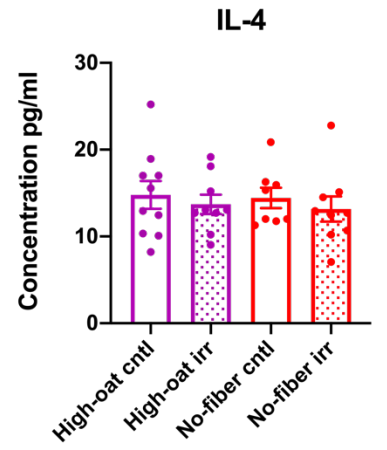

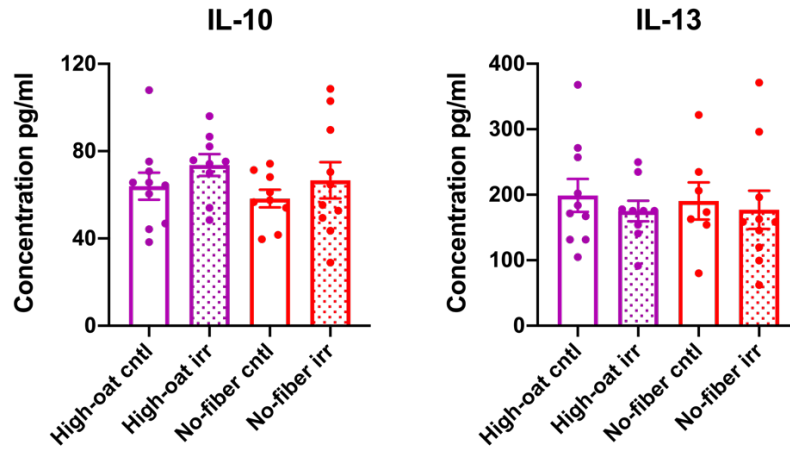

**Figure S2.** Serum cytokine and chemokine levels in mice at 6 weeks post-irradiation. A two-tailed Student's *t*-test was used to compare the levels of IL-1 $\alpha$ , IL-1 $\beta$ , IL-3, IL-10, IL-12p70, eotaxin, MIP-1 $\alpha$ , and MIP-1 $\beta$  in the High-oat irr vs. High-oat cntl, No-fiber irr vs. No-fiber cntl, High-oat irr vs. No-fiber irr, and High-oat cntl vs. No-fiber cntl groups. A Mann-Whitney test was used to compare the levels of IL-2, IL-4, IL-5, IL-6, IL-13, IL-17, GM-CSF, IFN- $\gamma$ , KC, MCP-1, RANTES, and TNF- $\alpha$  in the High-oat irr vs. High-oat cntl, No-fiber irr vs. No-fiber cntl, High-oat irr vs. No-fiber irr, and High-oat cntl vs. No-fiber cntl groups. Data are shown as averages and the error bars represent SEM.

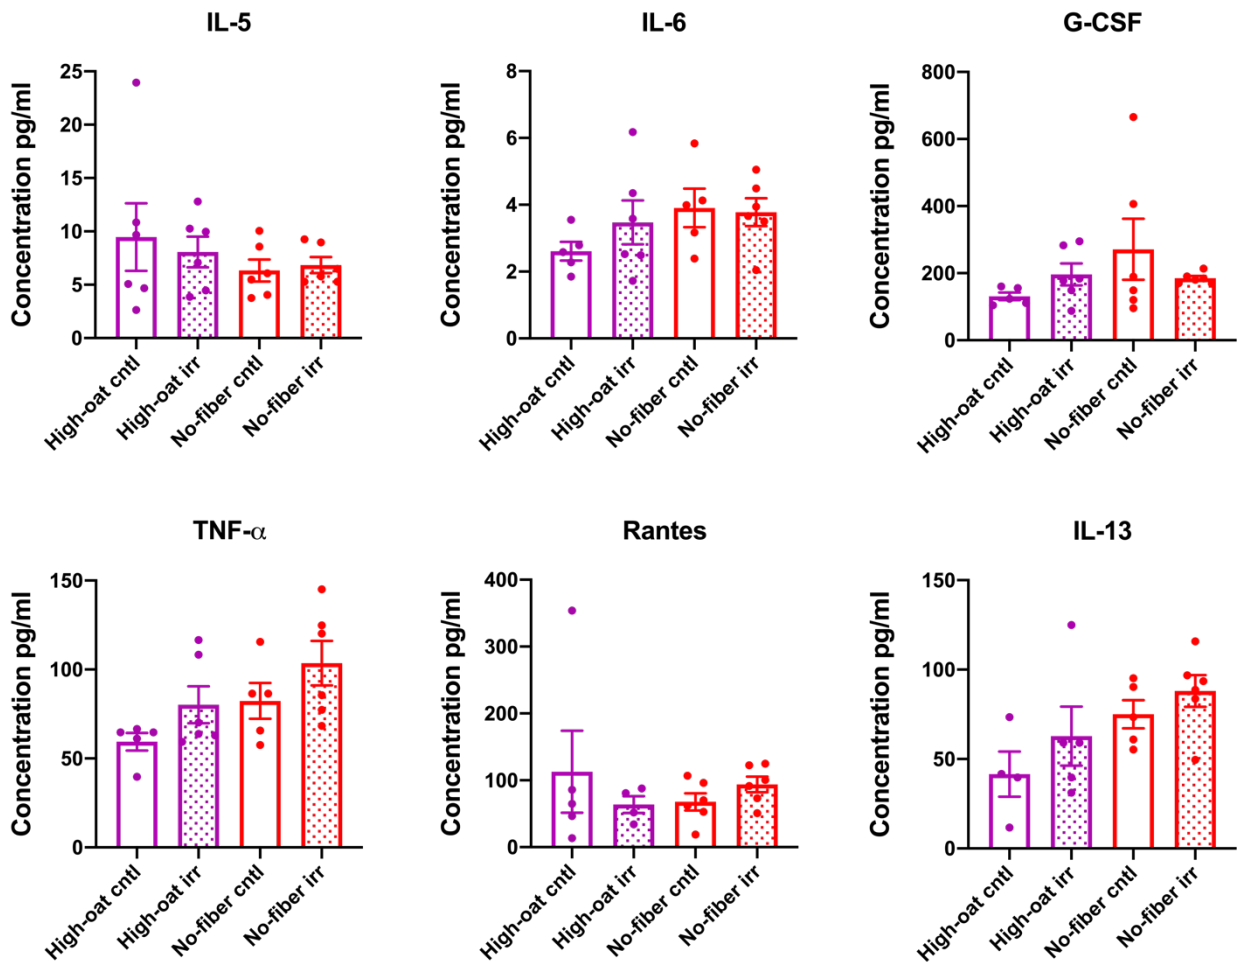

**Figure S3.** Serum cytokine and chemokine levels in mice at 18 weeks post-irradiation. A two-tailed Mann-Whitney test was used to compare the cytokine and chemokine levels in High-oat irr vs. High-oat cntl, No-fiber irr vs. No-fiber cntl, High-oat irr vs. No-fiber irr, and High-oat cntl vs. No-fiber cntl groups. Data shown are average concentrations and the error bars represent SEM.

A

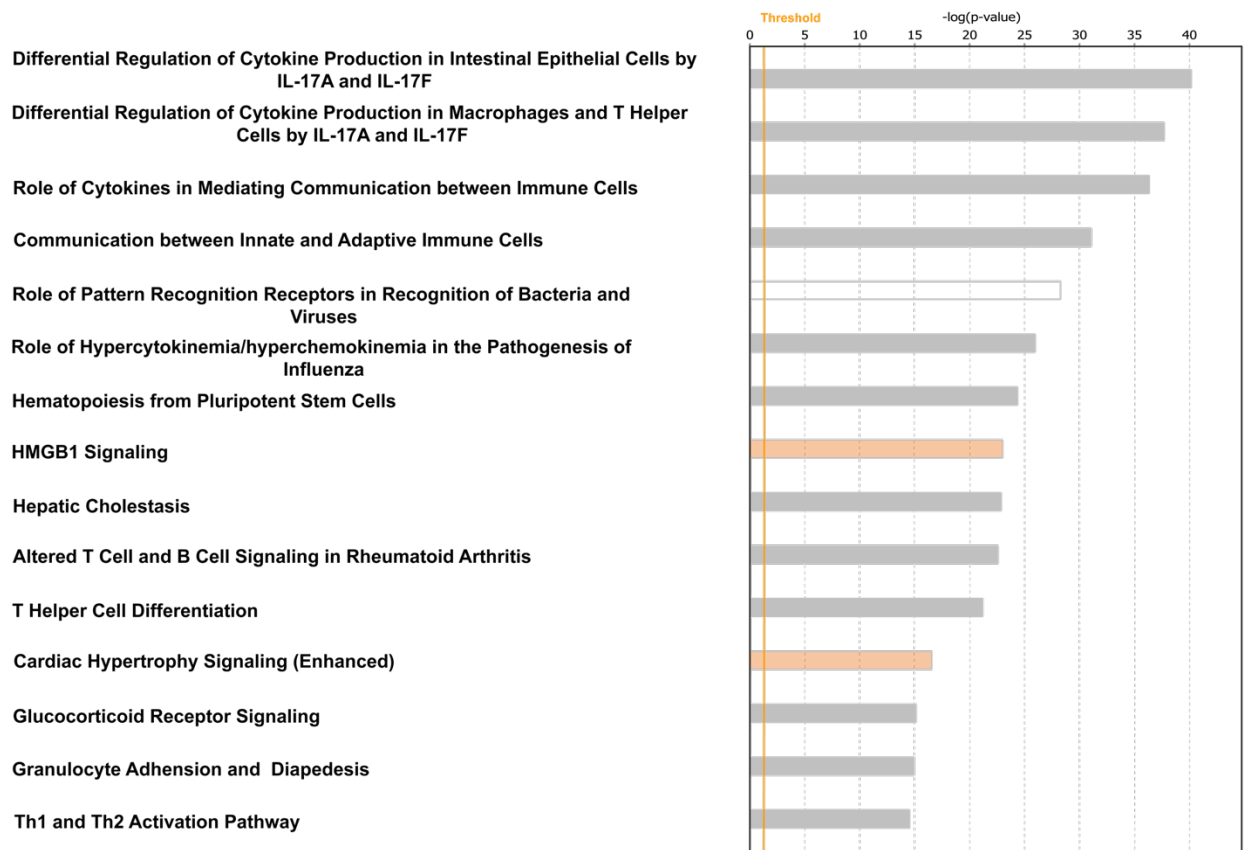

**B**

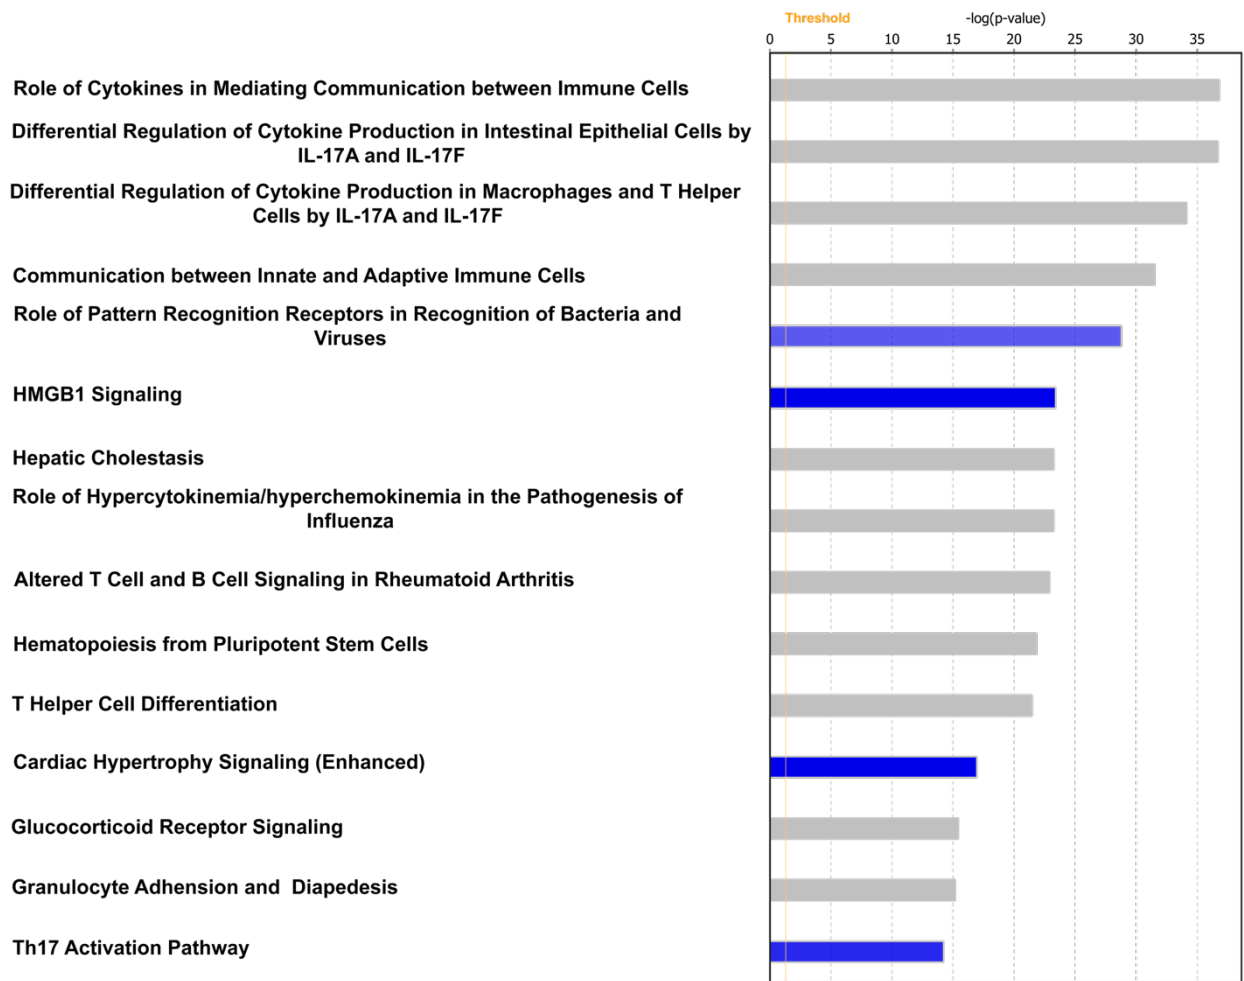



C

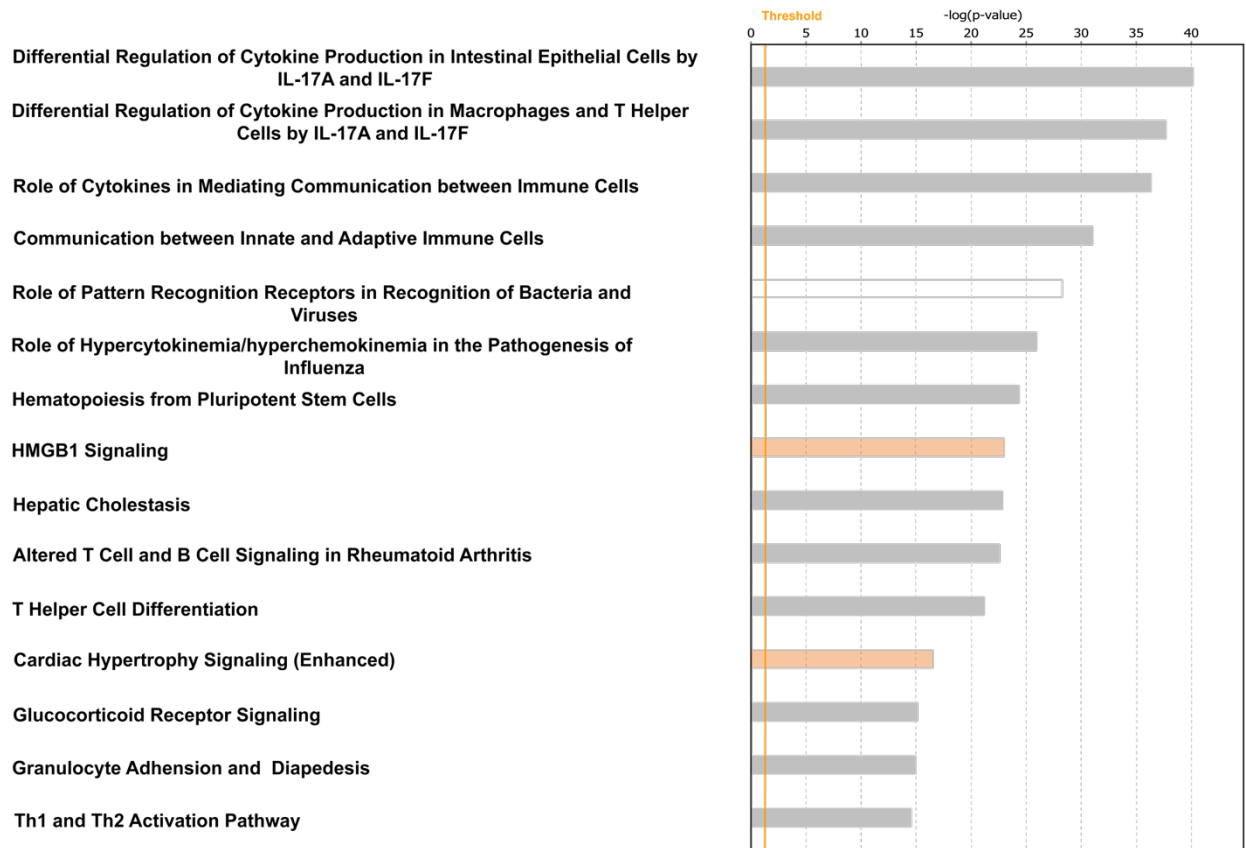

**Figure S4.** Pathway enrichment analysis. The top 15 canonical pathways associated with the cytokine profiles at (A) 1, (B) 6, and (C) 18 weeks post-irradiation, as determined by IPA. The bars indicate  $-\log(p\text{-values})$  calculated using Fisher's exact test, with the threshold set at  $p = 0.05$ .

A

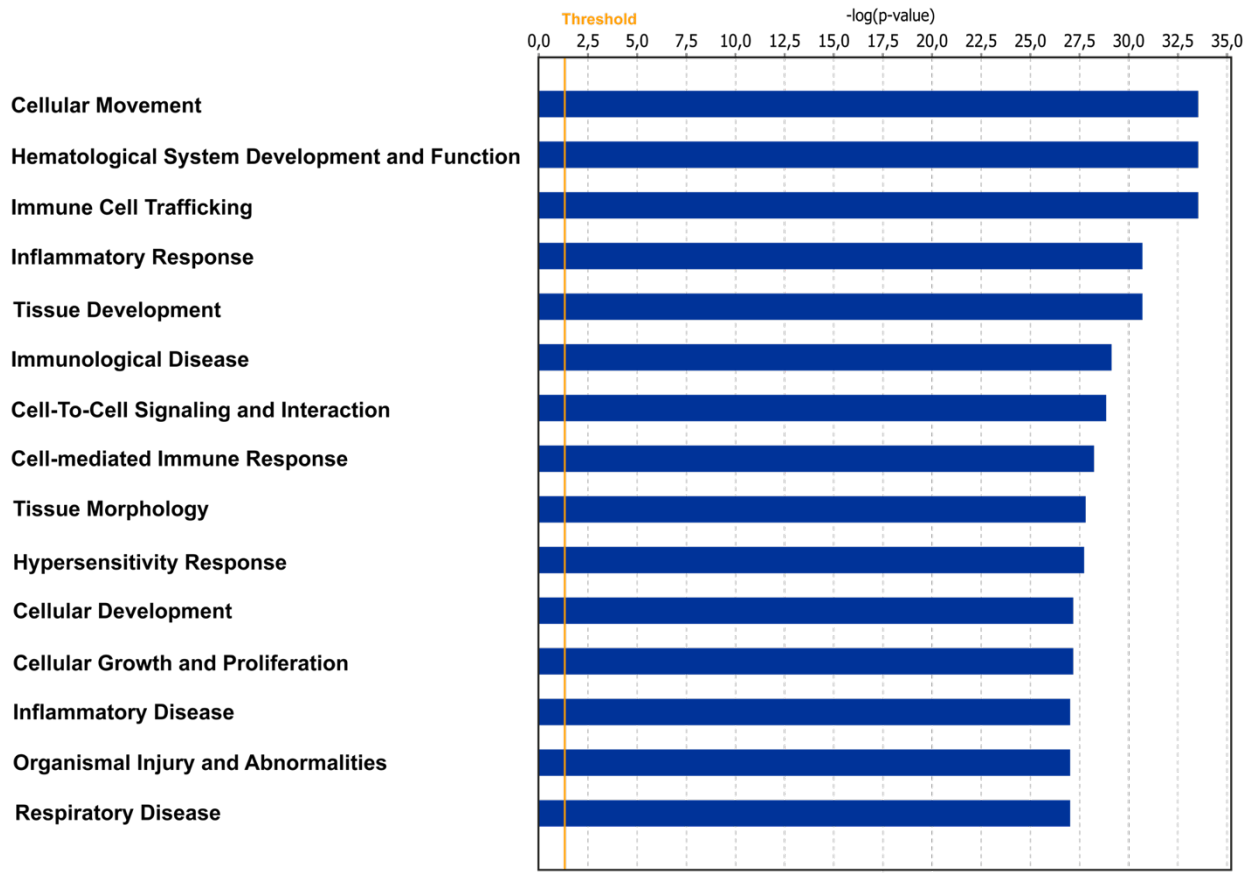

B

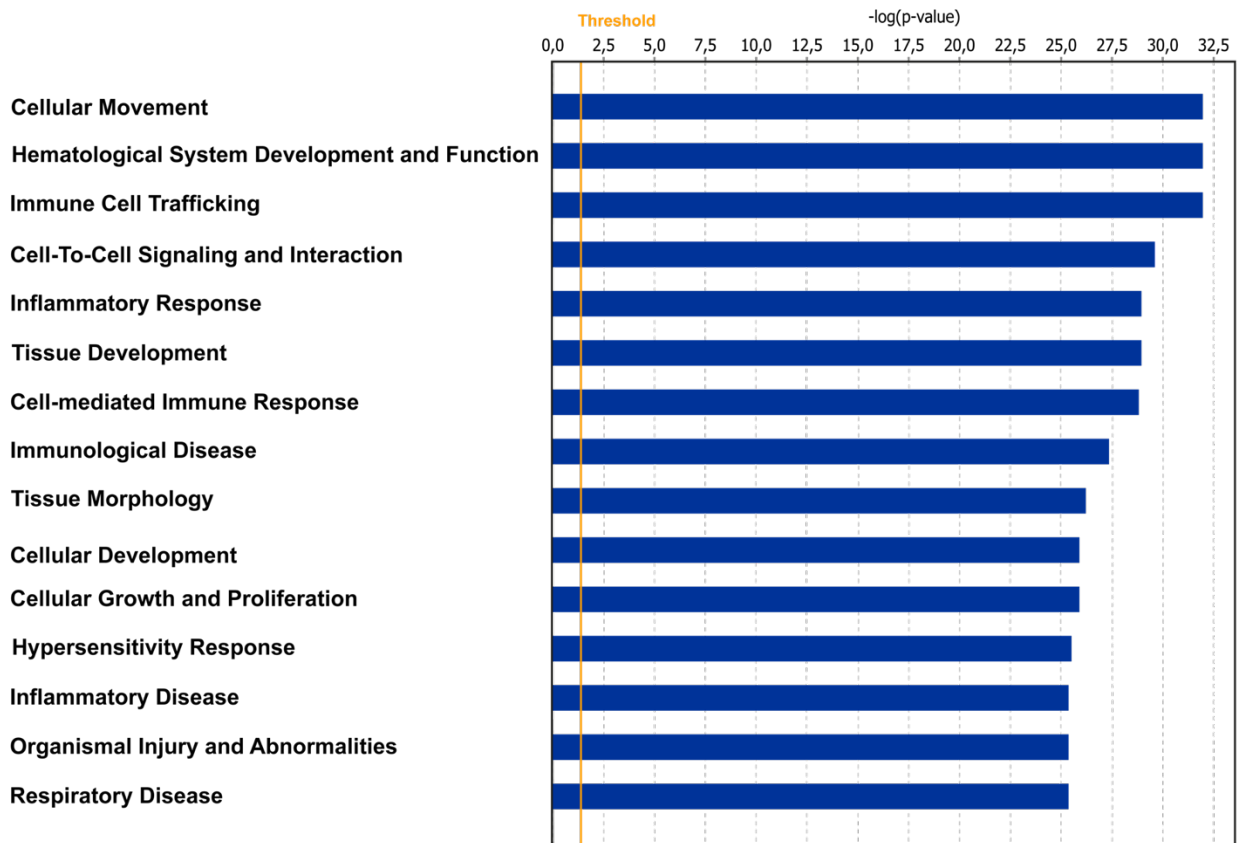

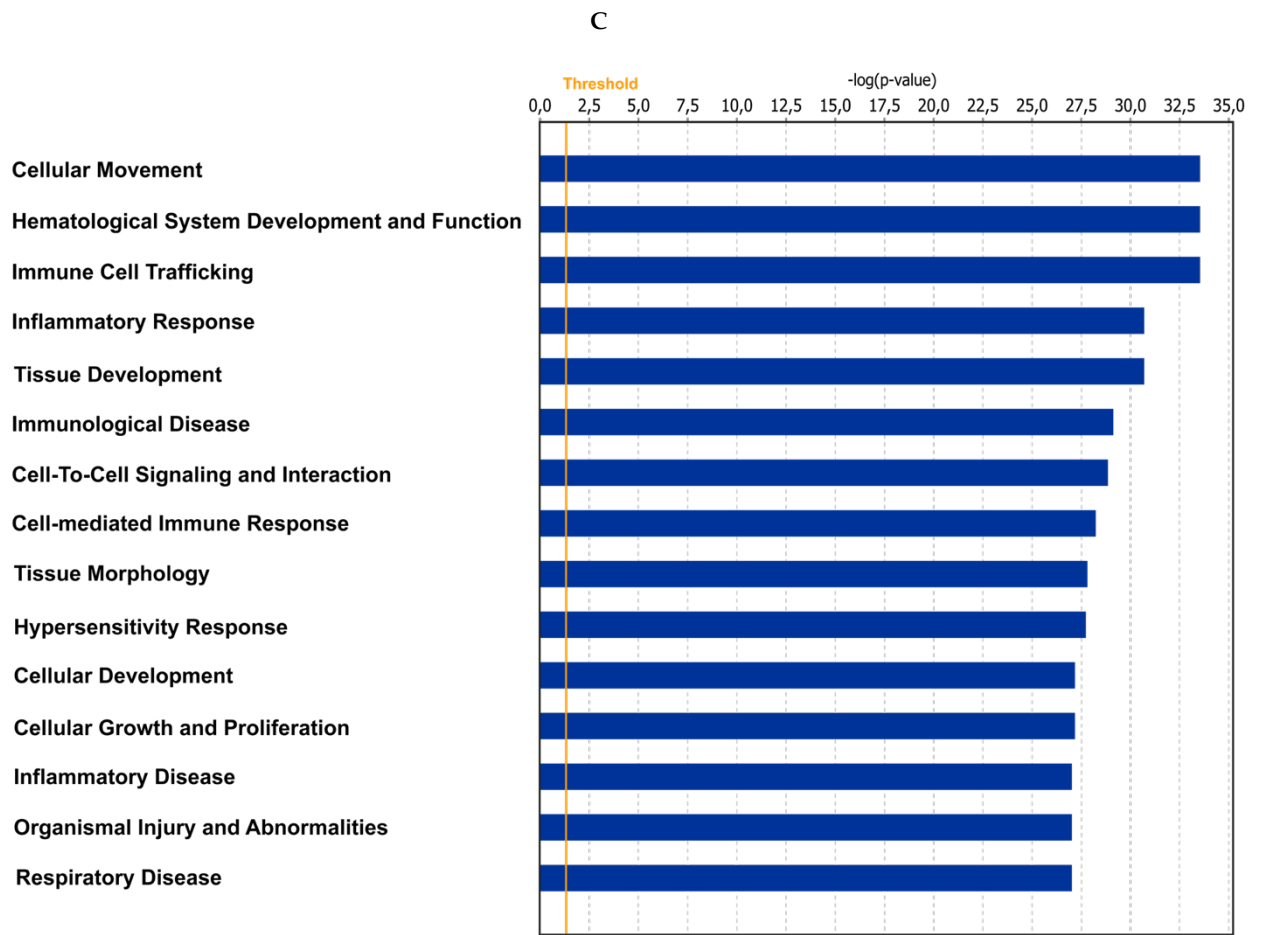

**Figure S5.** Biological function and disease enrichment analysis. The top 15 biological functions or diseases associated with the cytokine profiles at (A) 1, (B) 6, and (C) 18 weeks post-irradiation, as determined by IPA. The bars indicate  $-\log(p\text{-values})$  calculated using Fisher's exact test, with the threshold set at  $p = 0.05$ .
